# Supplementary material
Source: Research Square preprint supplement (doi:10.21203/rs.3.rs-9099089/v1)
Supplement: Supplementary file 1 [file 4d6d4806a34c57573fe0649f.pdf]

## Molecular modelling of the adipokinetic hormone receptor from the stick insect *Carausius morosus*, and its endogenous agonist

G. E. Jackson<sup>1</sup>, H. G. Marco<sup>2</sup>, M.-A. Sani<sup>3\*</sup>, F. Separovic<sup>3</sup>, G. Gäde<sup>2</sup>

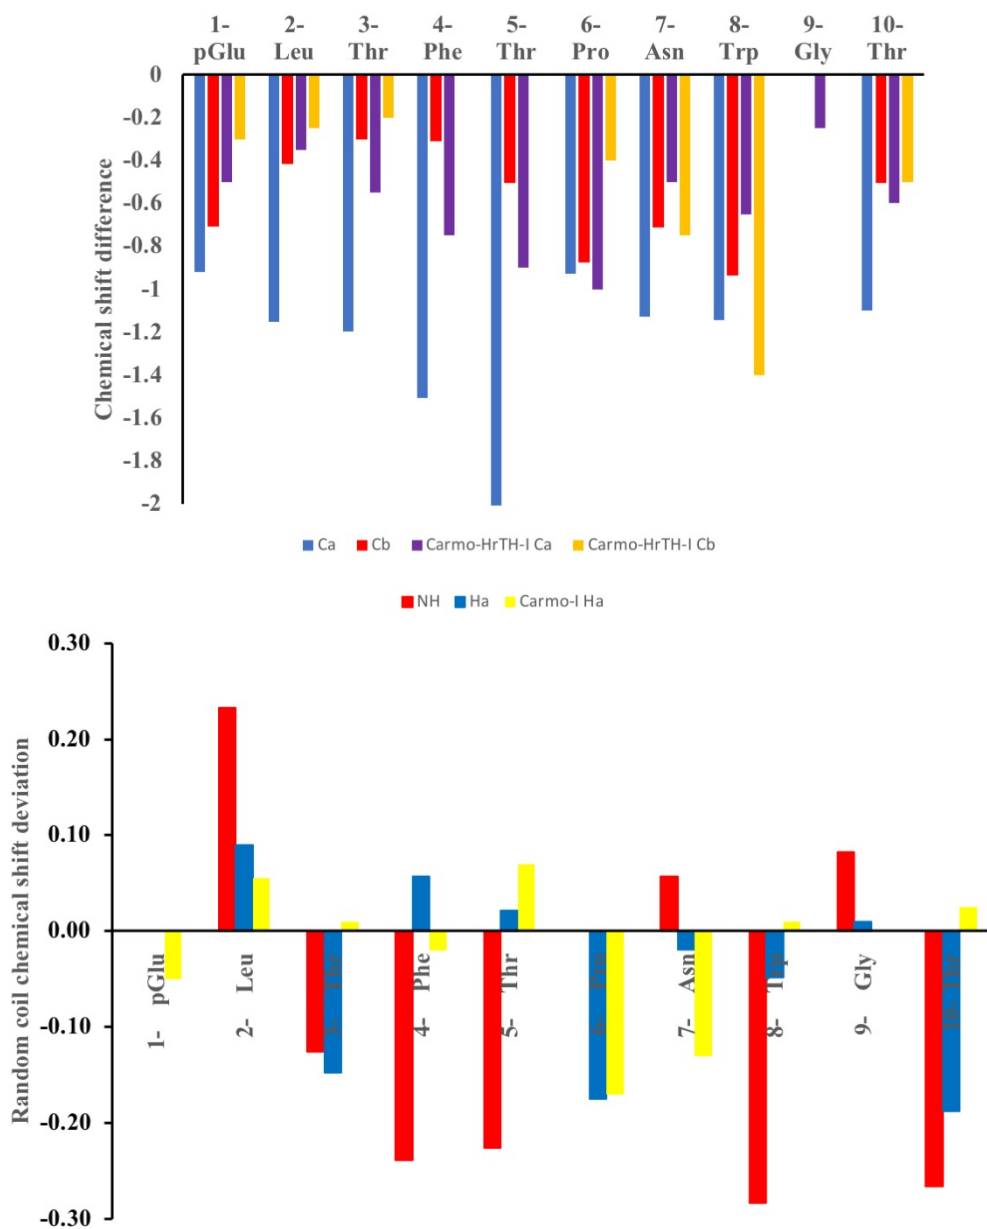

Figure S1. Random coil chemical shift differences of Carmo-HrTH-I and II (a) C<sub>α</sub> and C<sub>β</sub> and (b) NH, N<sub>α</sub>. Data for Carmo-HrTH-I in D<sub>2</sub>O solution is taken from reference {Munte, 2008 #435}

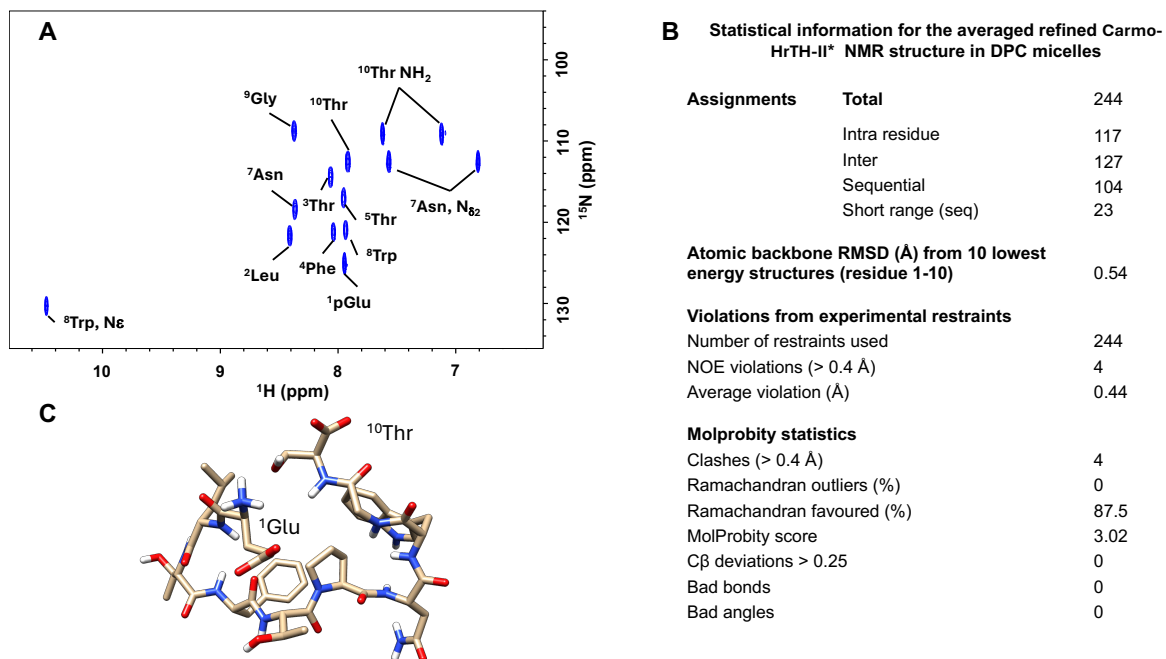

**Figure S2 (A)**  $^{15}\text{N}$  HSQC spectra of Carmo-HrTH-II in DPC micelles. Experiments were performed at 298 K. **(B)** statistical parameters used for the structure calculation and Molprobdity validation outcome and **(C)** averaged structure of Carmo-HrTH-II.

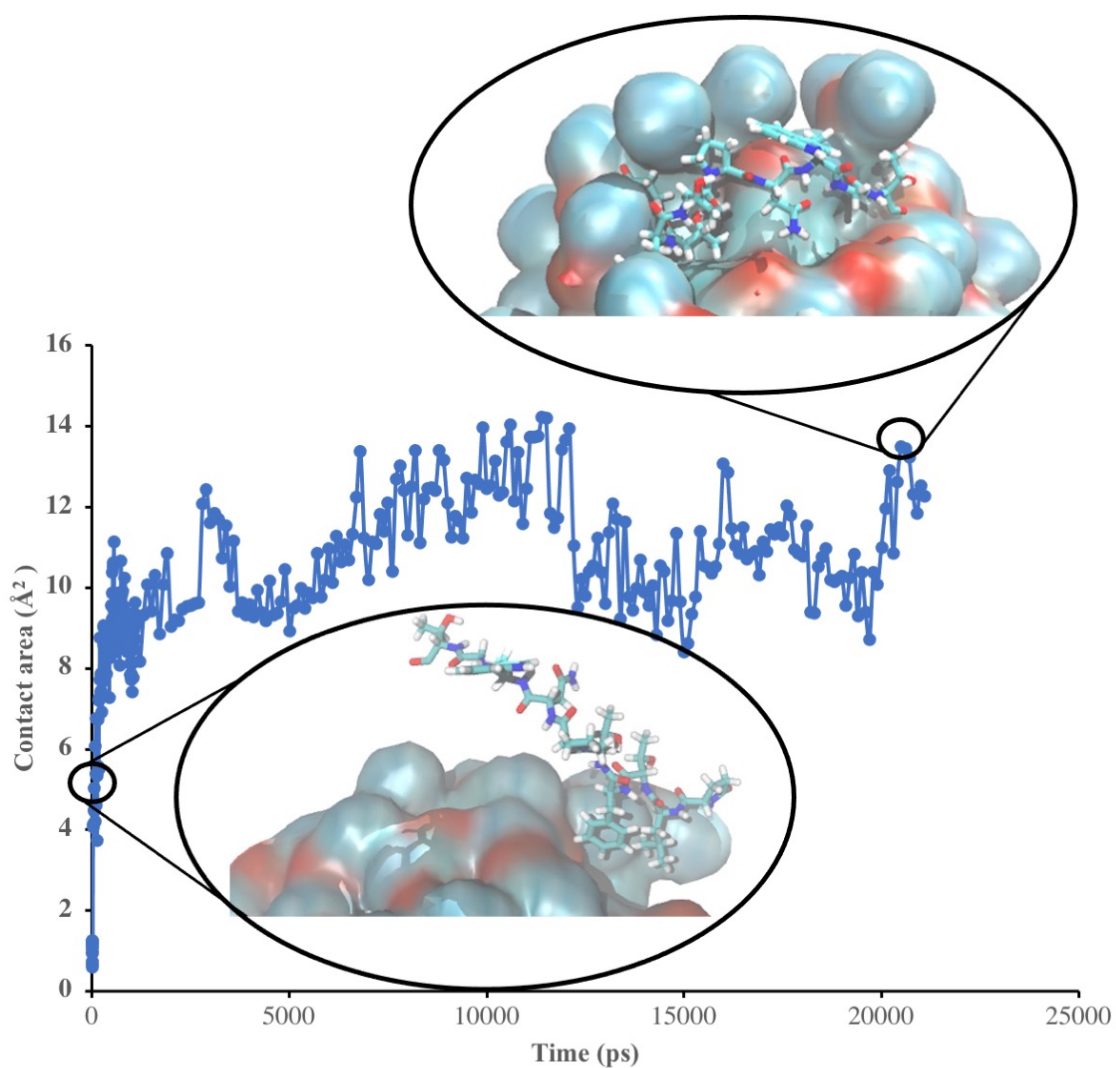

Figure S3. Surface contact area between DPC micelle and Carmo-HrTH-II during MD simulation. Two snapshots of the structure are shown. For clarity, water is not shown and the DPC is shown as an electrostatic surface.

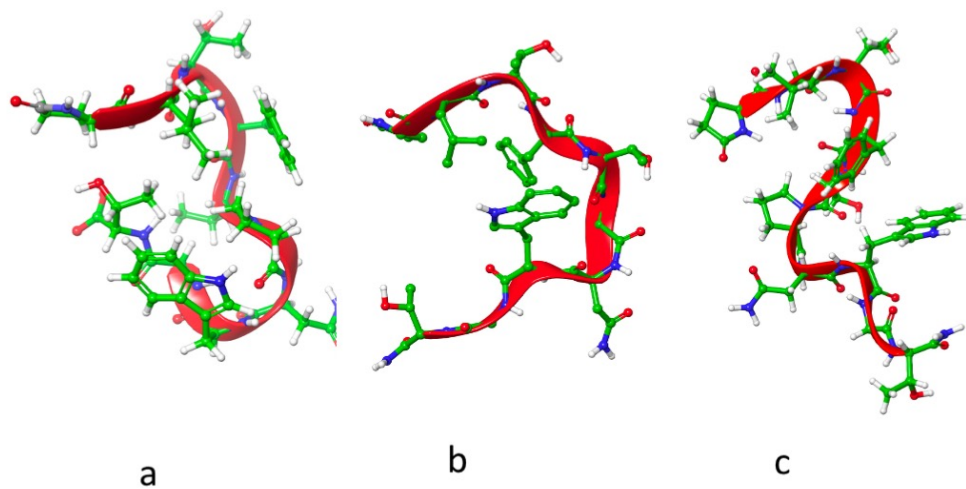

Figure S4. Comparison of Carmo-HrTH-II (a) Average structure from NMR, (b) Predominant structure in DPC micelle solution, (c) Docked structure after MD.

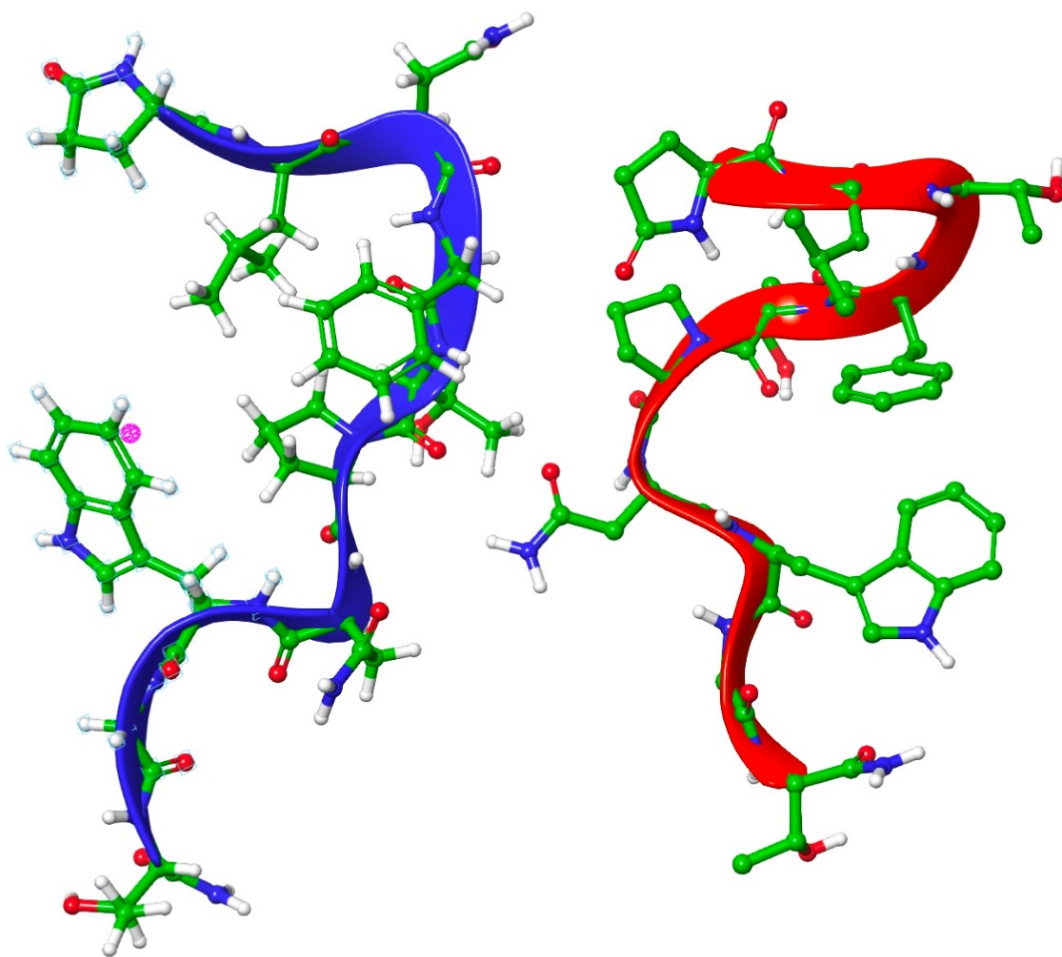

Figure S5. Carmo-HrTH-II (red ribbon) and Locmi-AKH-I (blue ribbon).

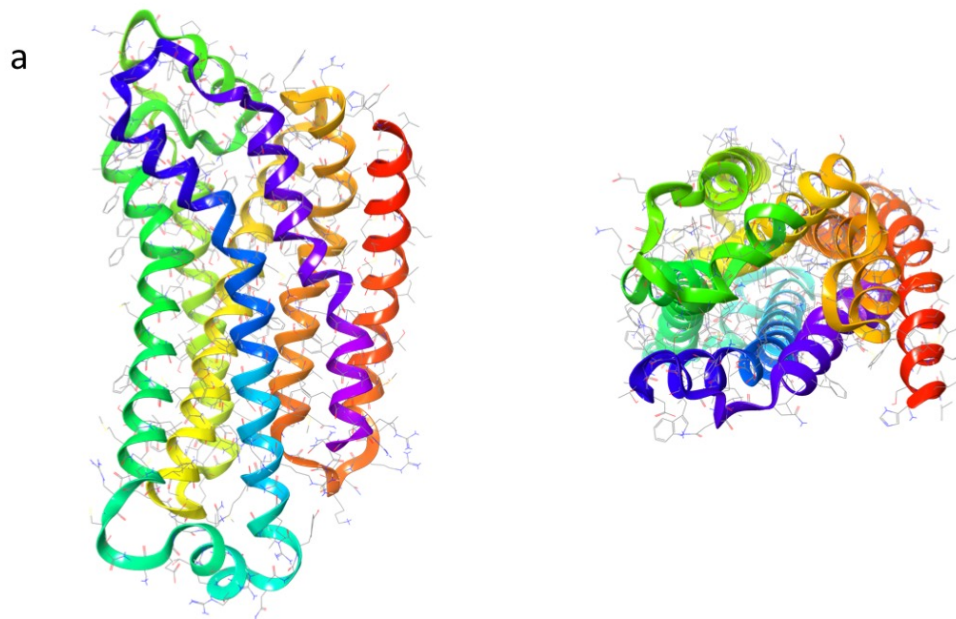

Carmo-AKHR open model.

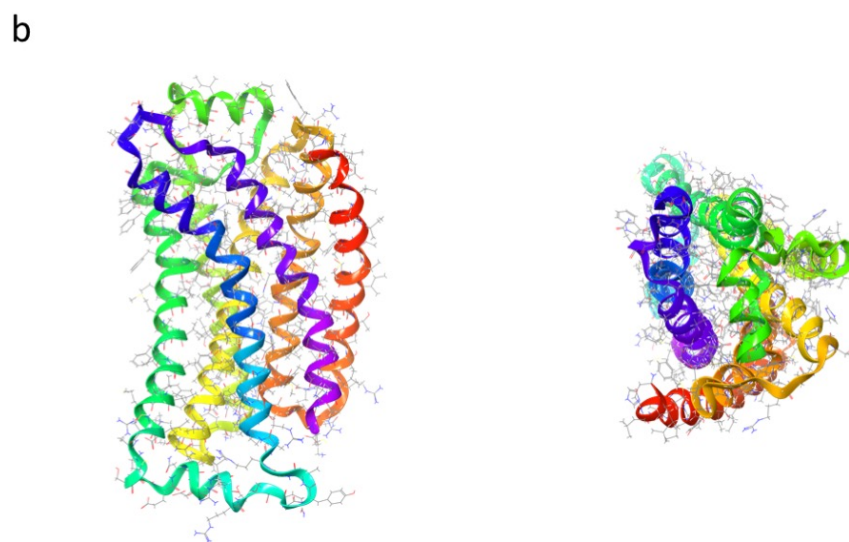

Carmo-AKHR closed model.

Figure S6. Side and top view of Carmo-AKHR model (a) 'Open' inactive conformation and (b) 'Closed' active conformation

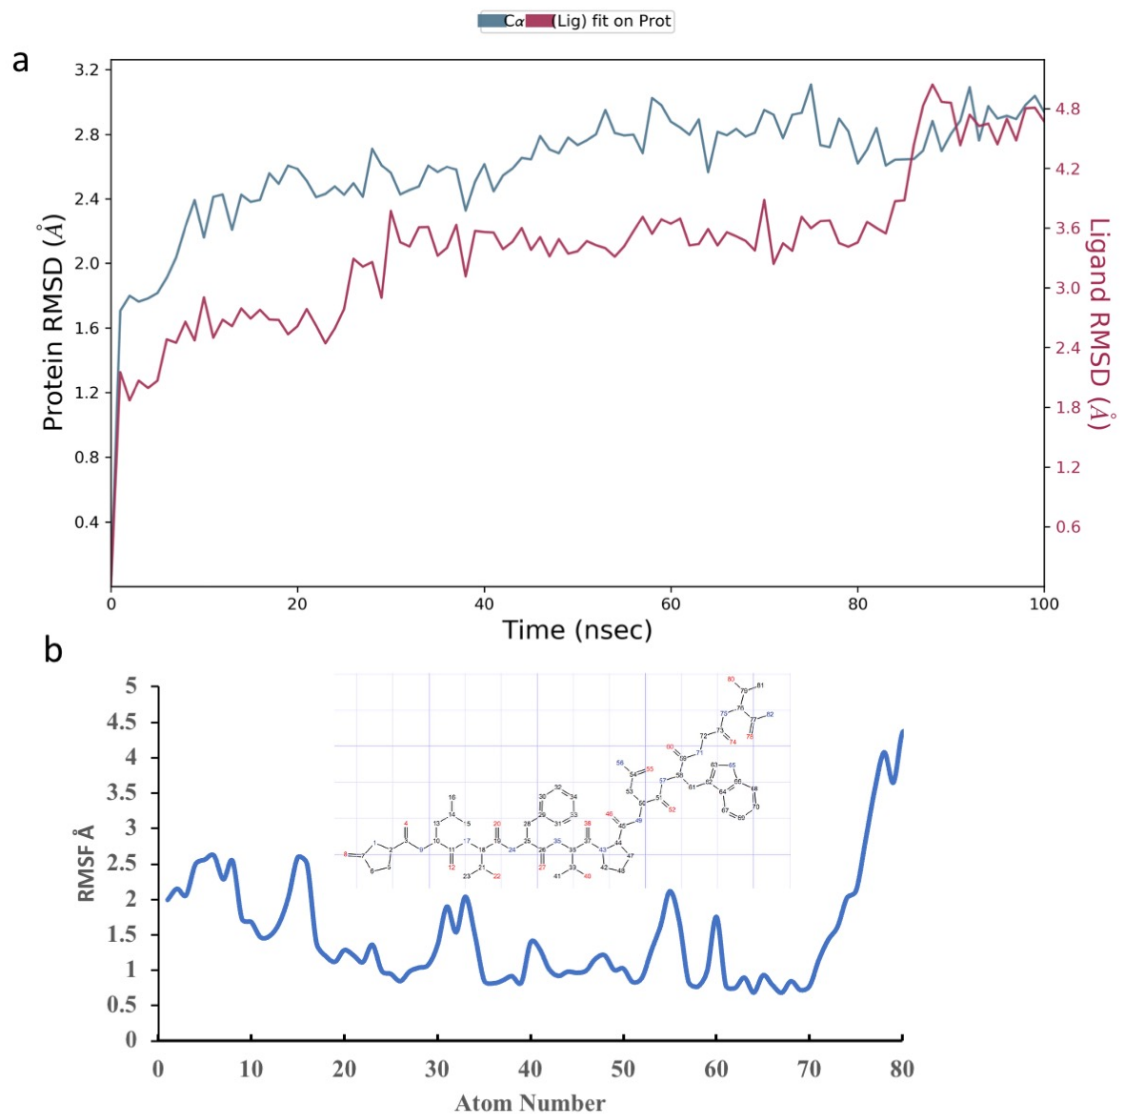

Figure S7 (a) RMSD of Carmo-HrTH-II/CarmoAKHR complex. b) RMSF of Carmo-HrTH-II.

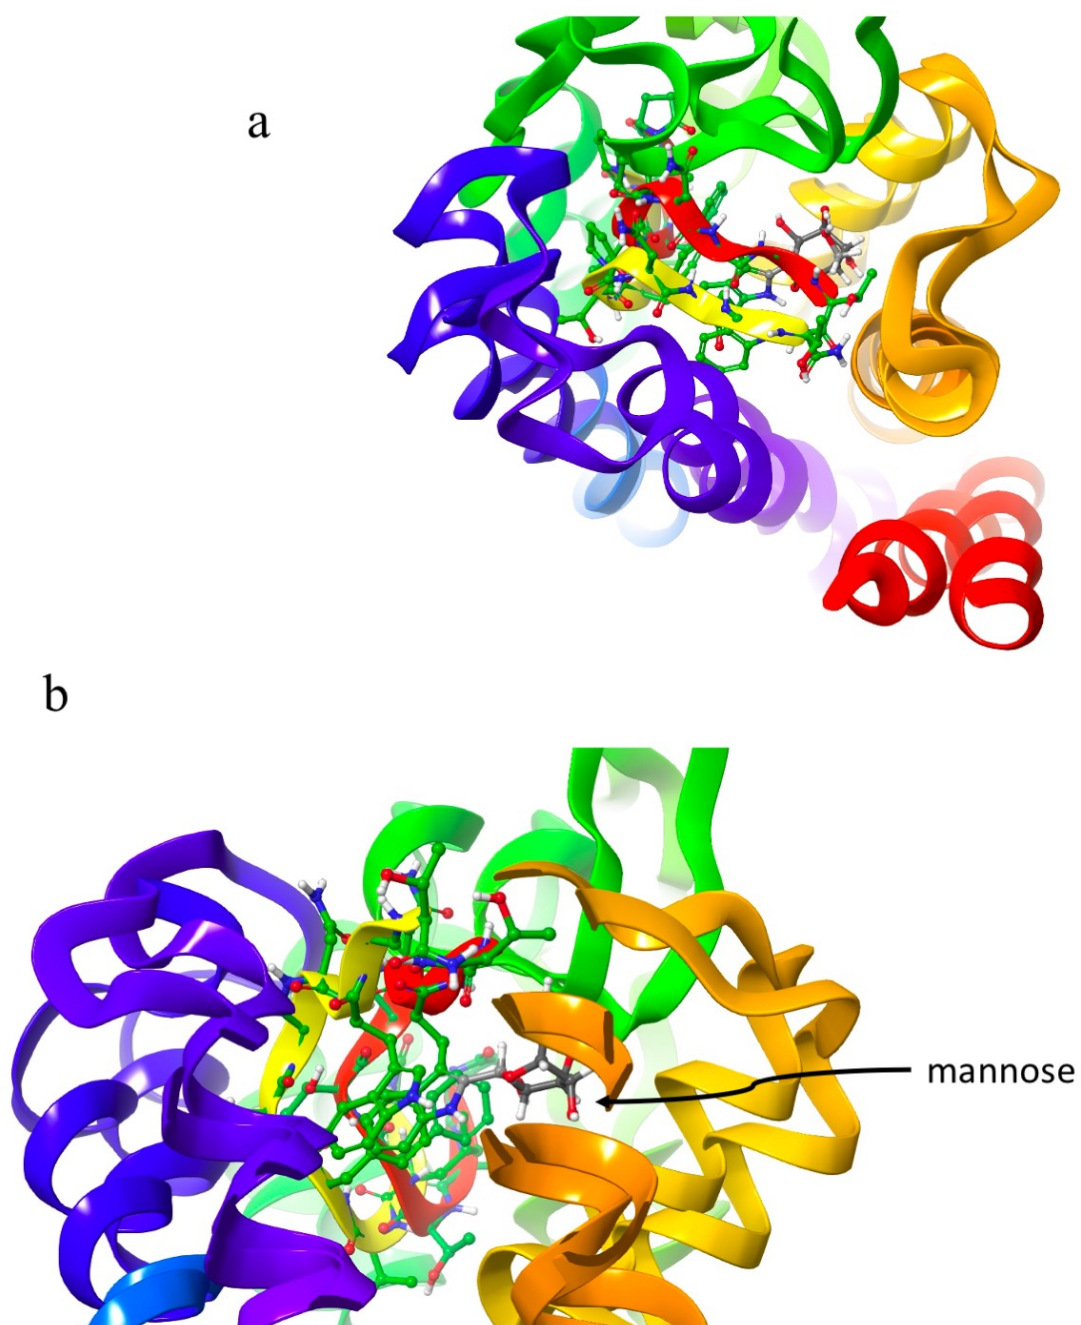

Fig S8. Overlay of Carmo-HrTH-I (red) and II (yellow) in the binding pocket of Carmo-AKHR. (a) top view, (b) side view.

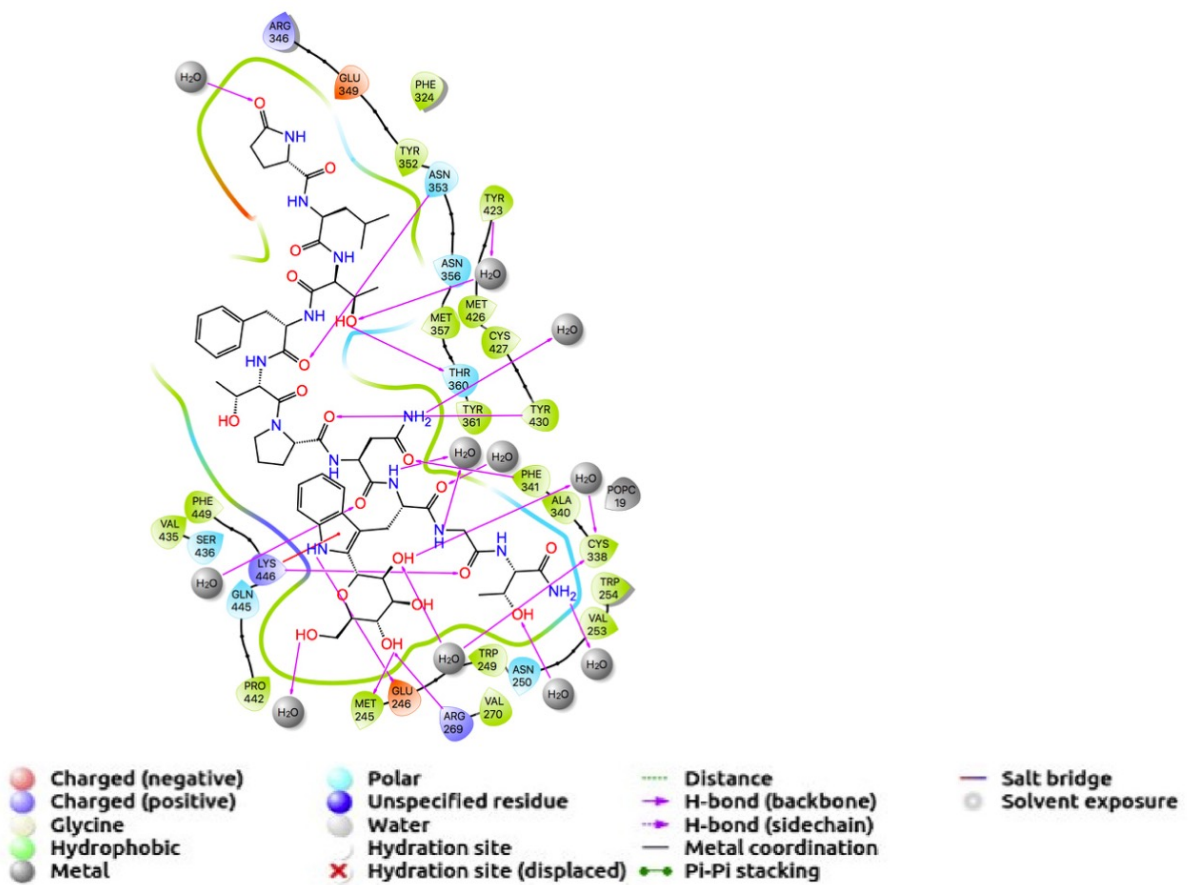

Figure S9. Ligand interaction diagram of Carmo-HrTH-I docked to Carmo-AKHR.

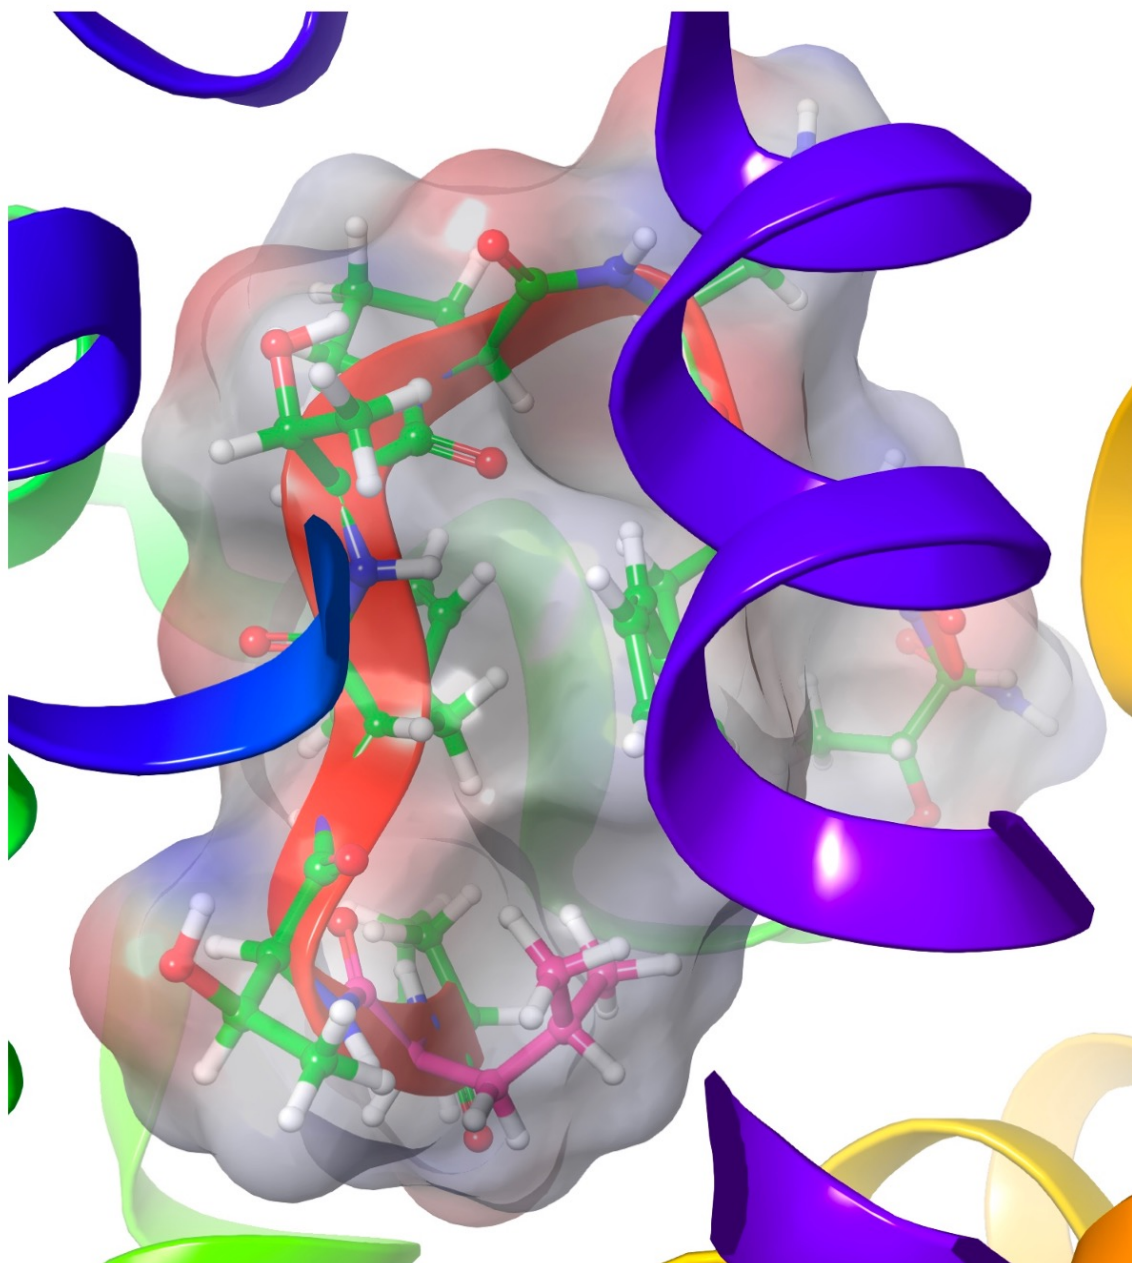

Figure S10. Carmo-AKHR binding pocket. Leucine 2 is displayed in pink. For clarity some of the helices are not shown

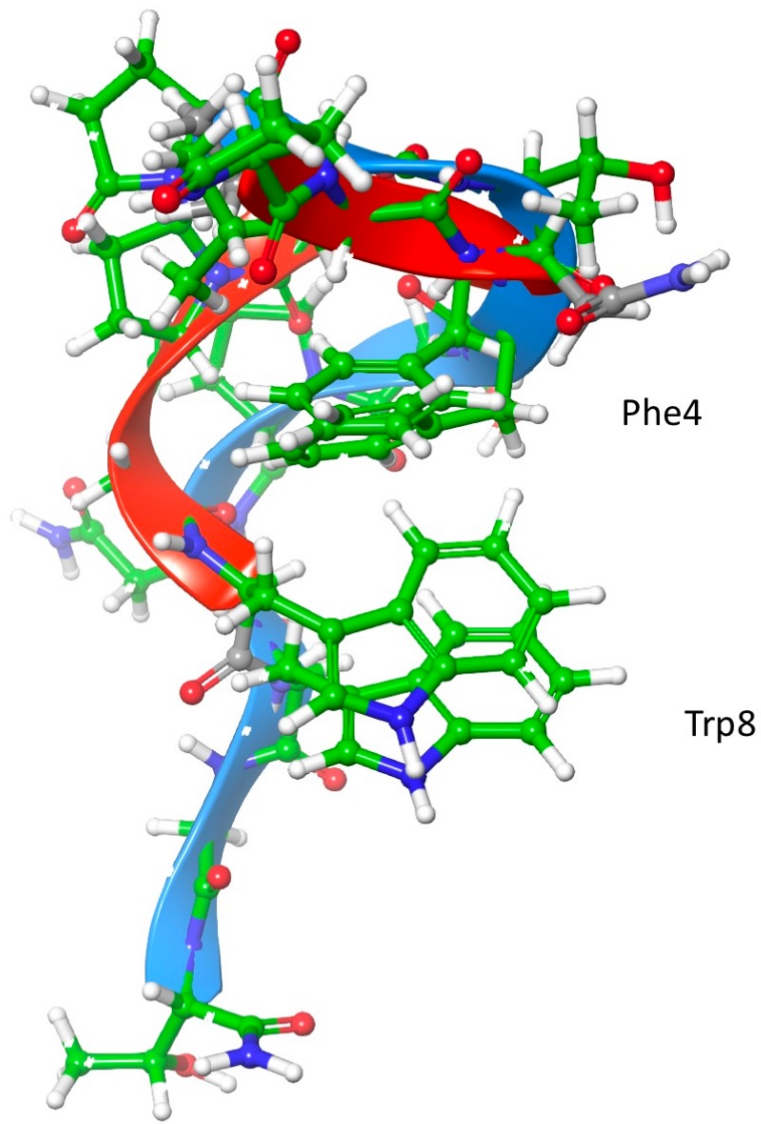

Figure S11. Overlay of Panbo-RPCH (red) and Carmo-HrTH-II (blue) in Carmo-AKHR binding site., showing the orientation of Phe4 and Trp8.

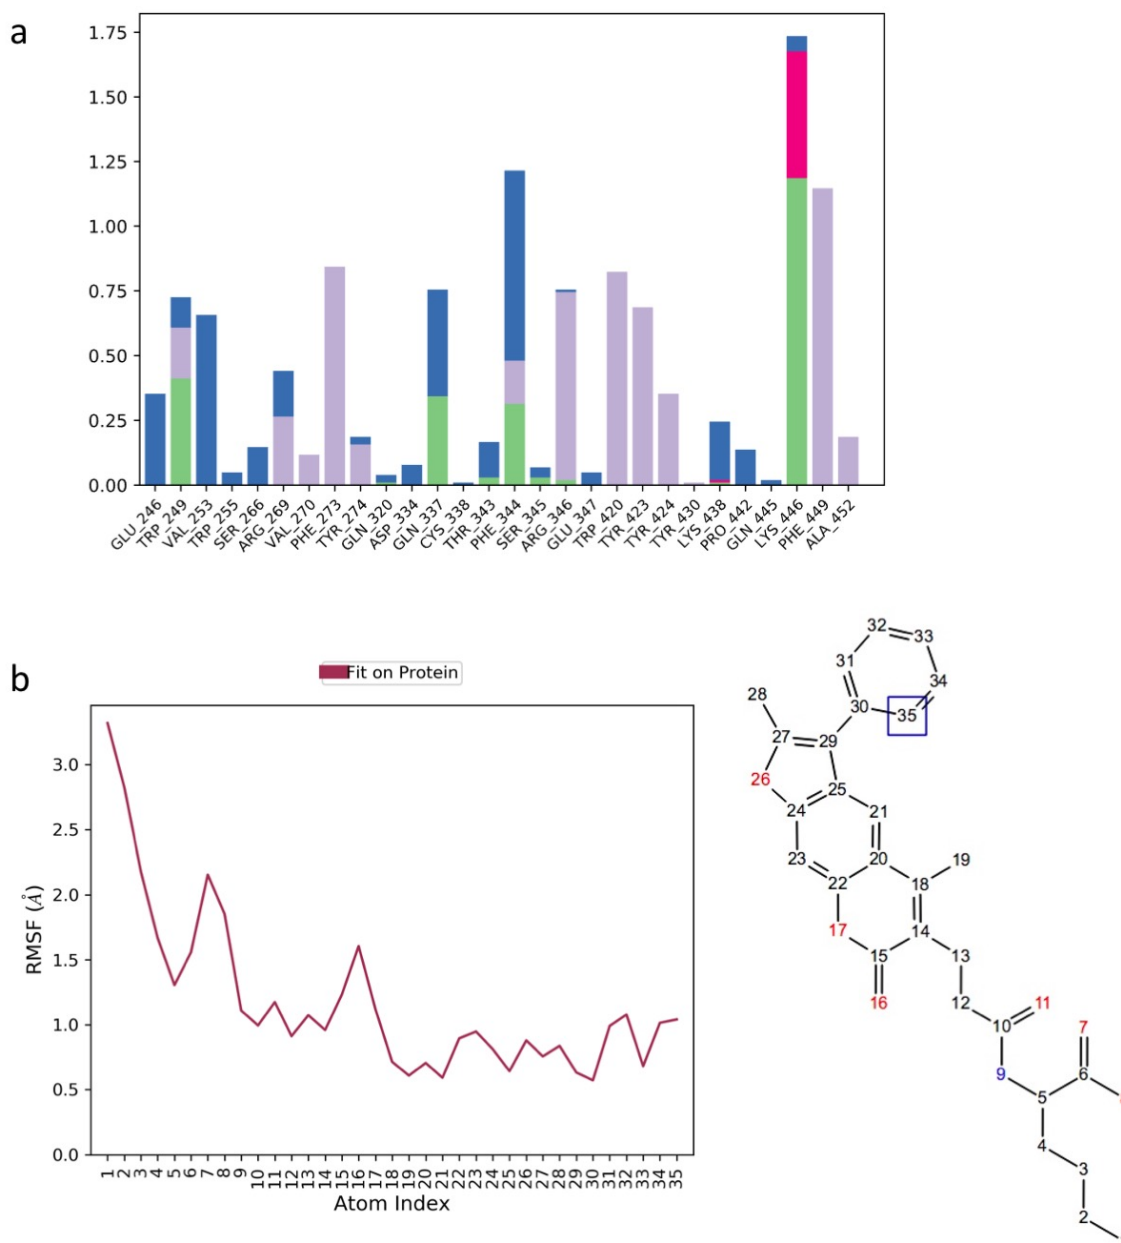

Figure S12. (a) RMSF of Cpd 2429 docked to Carmo-AKHR.(b) Protein ligand interactions as a % of simulation time. The interactions are colour coded: Green = H-bonds; Grey = Hydrophobic; Red = Ionic and Blue = Water bridge.

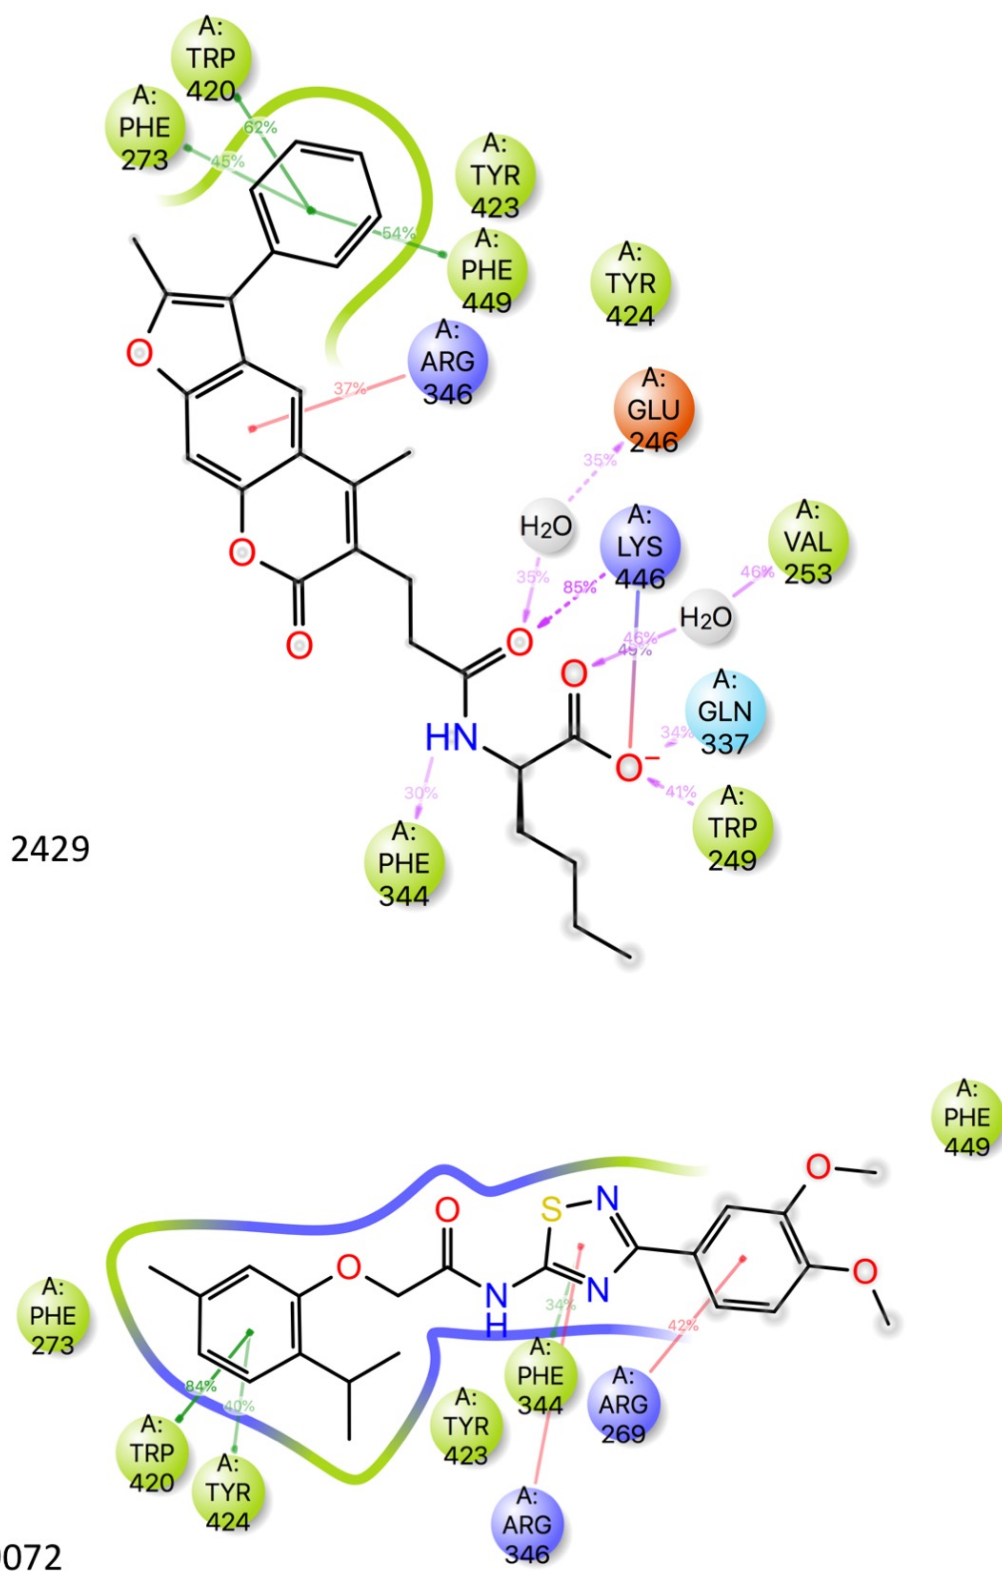

Figure S13. Simulation interaction diagram of compounds 2429 and 9072.

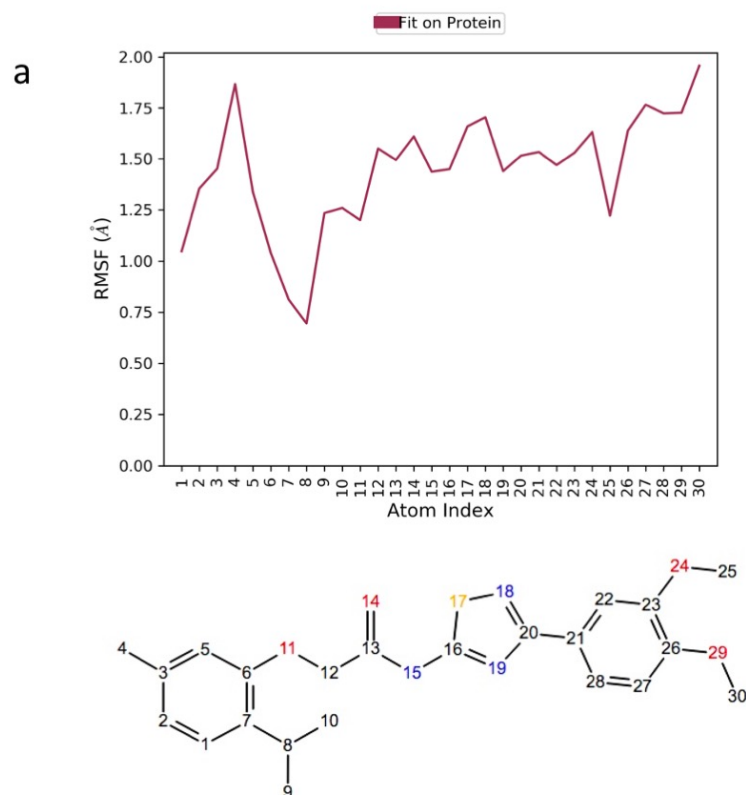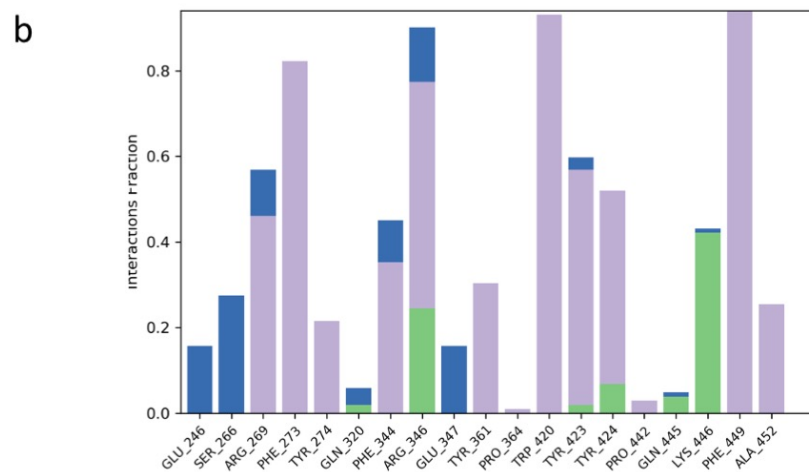

Figure S14. (a) RMSF of Cpd 9072 docked to Carmo-AKHR.(b) Protein ligand interactions as a % of simulation time. The interactions are colour coded: Green = H-bonds; Grey = Hydrophobic; Red = Ionic and Blue = Water bridge.
